# Supplementary material for: New halo(pseudohalo)cadmates templated by protonatated N-heterocyclic/diamine molecules
Source: Royal Society of Chemistry journal article supplement (doi:10.1039/c3ra43421d), 2013-01-01
Supplement: c3ra43421d.pdf [file c3ra43421d.pdf]

# Supporting materials

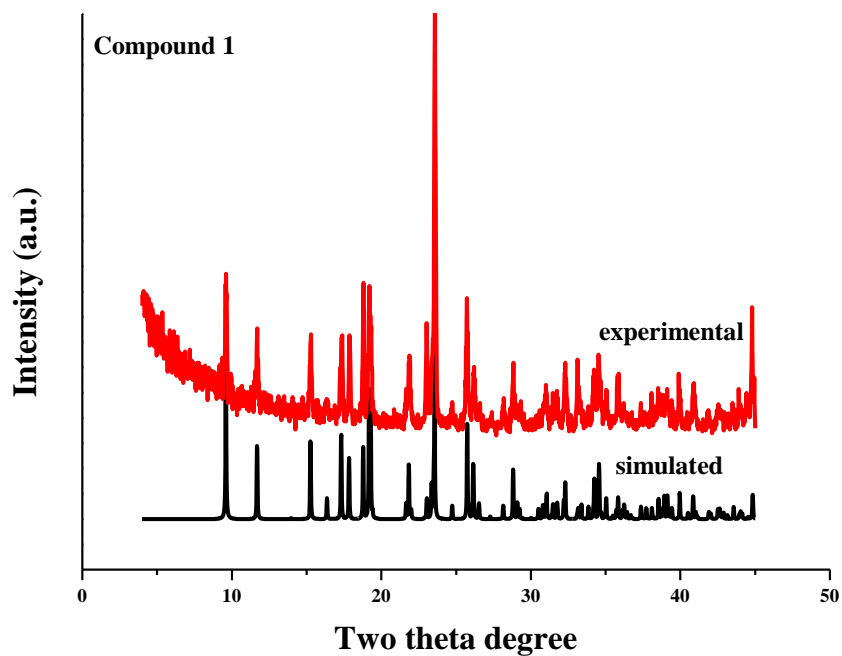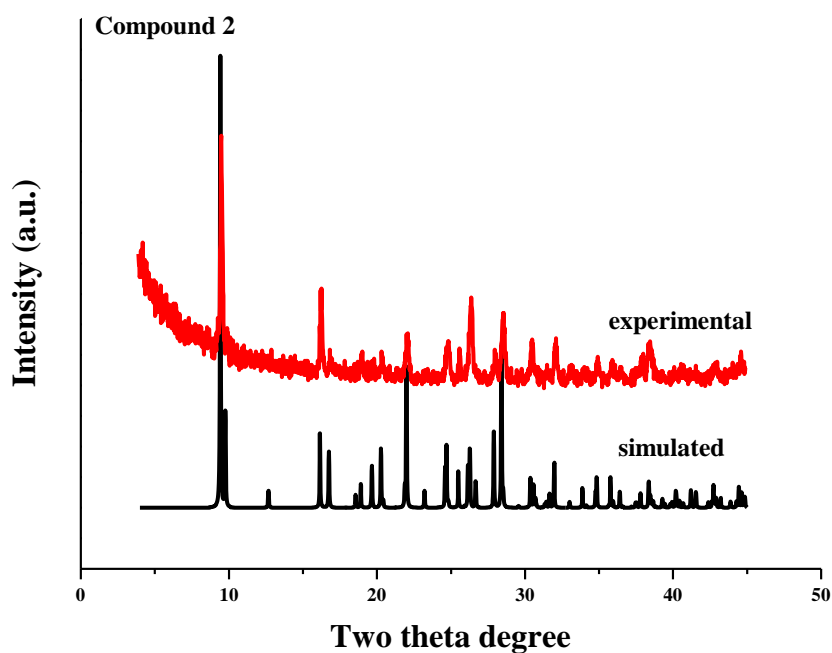

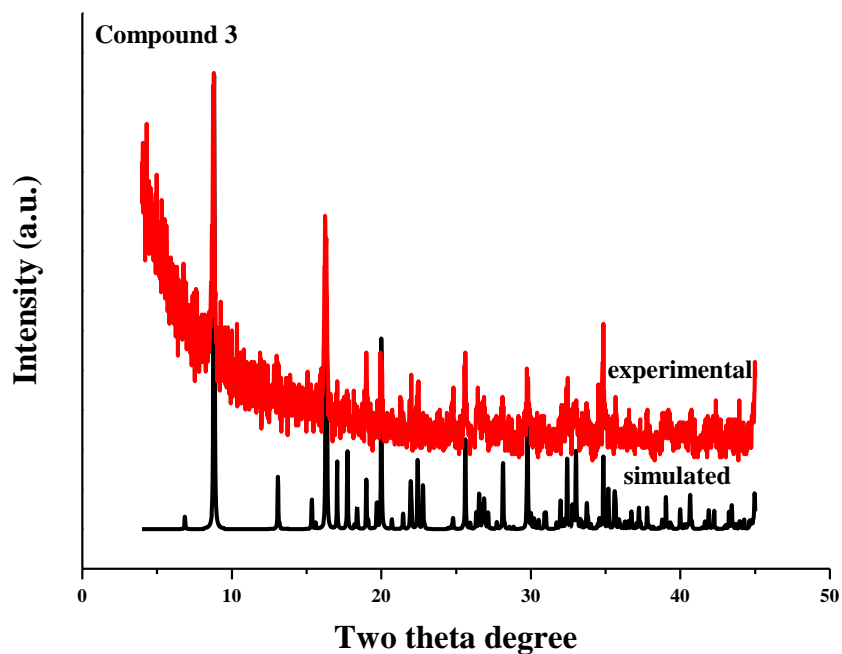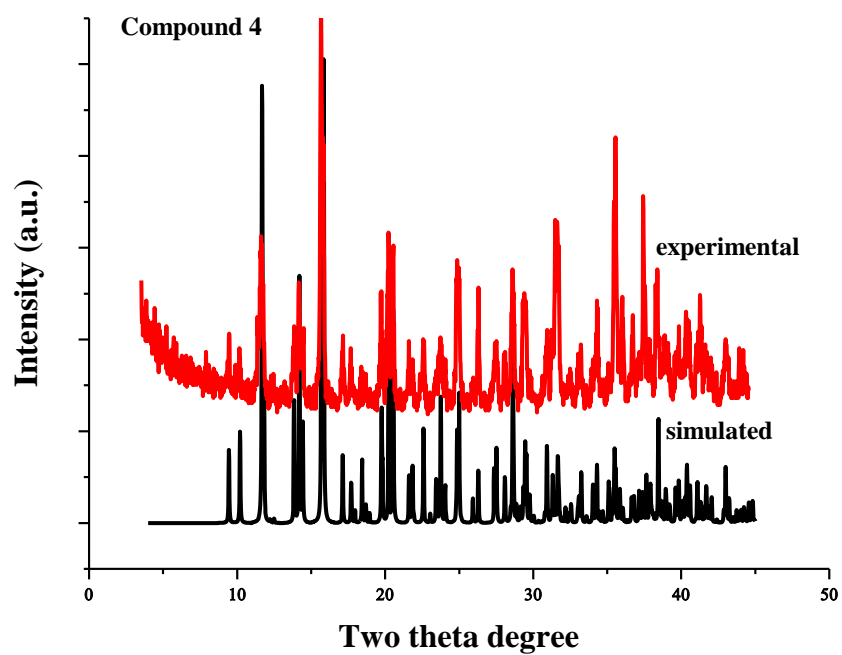

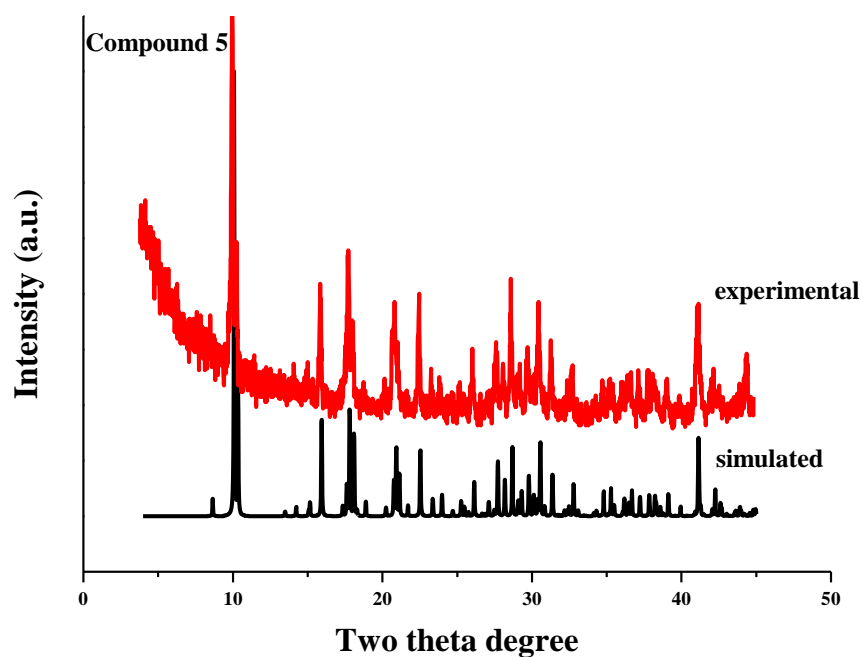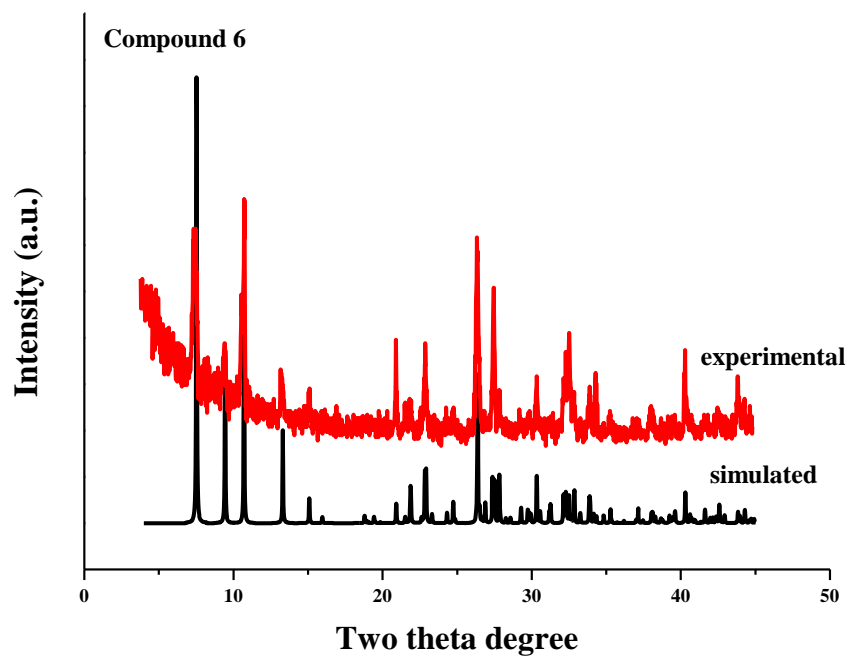

Fig. S1 Powder X-ray diffraction (XRD) patterns for the title compounds.

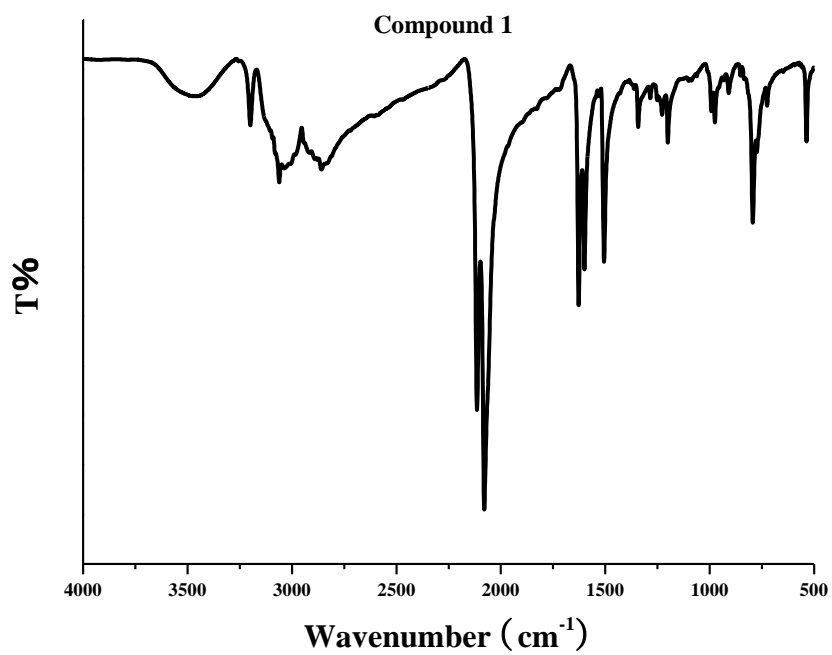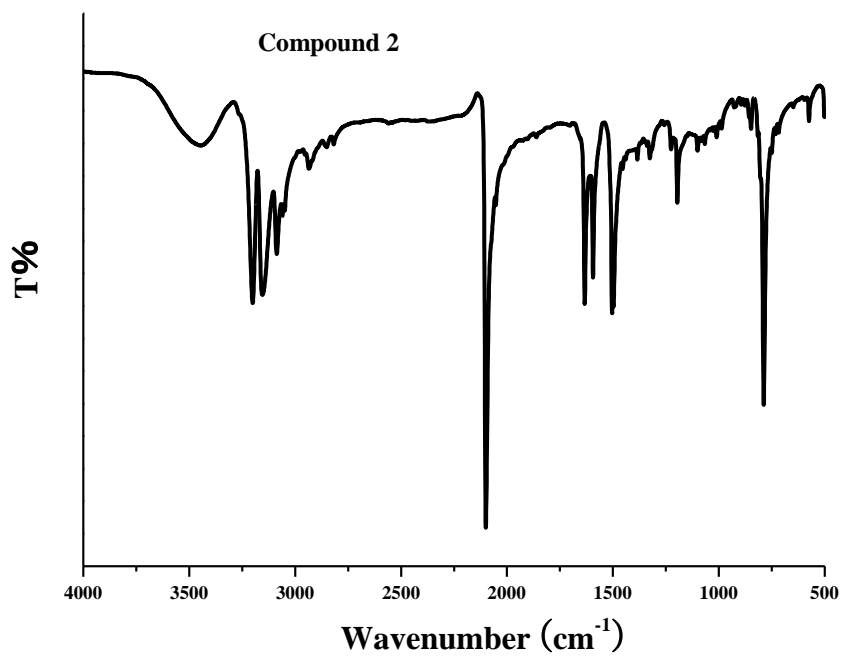

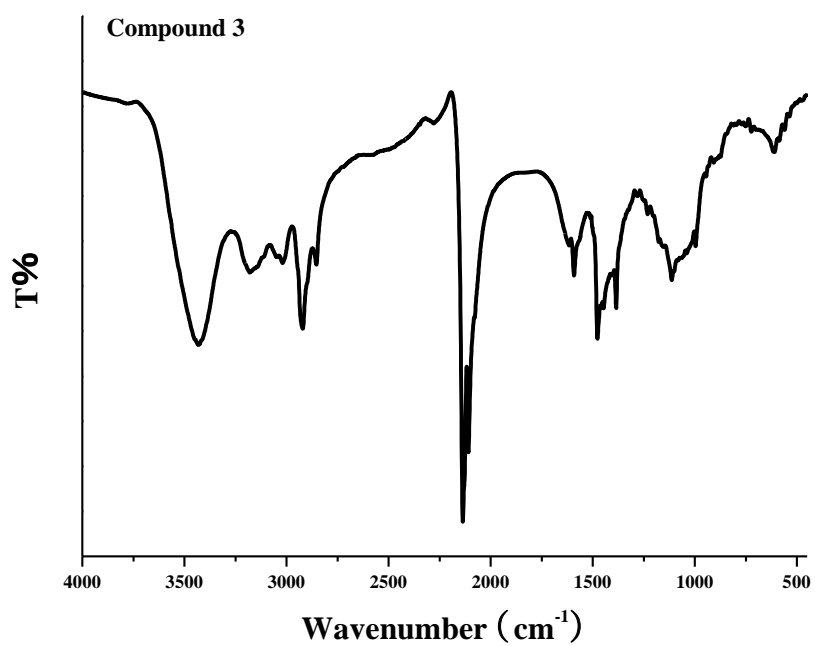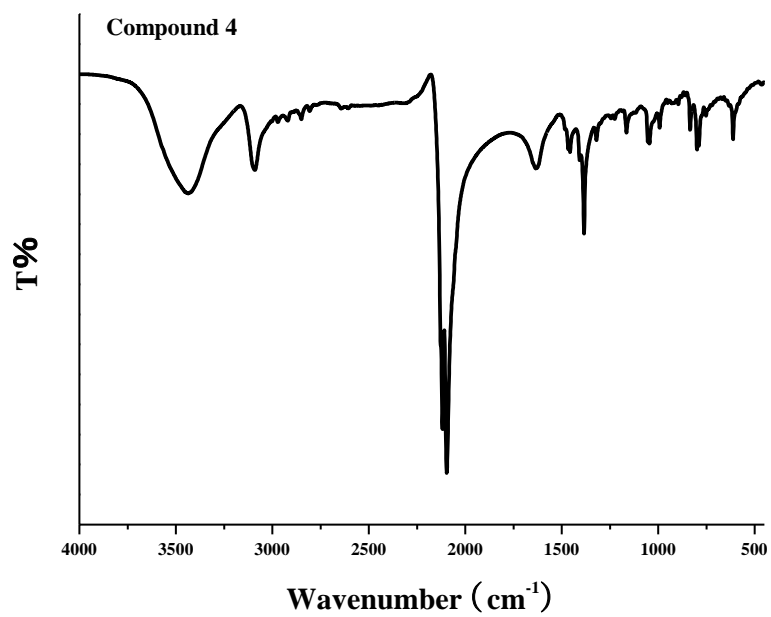

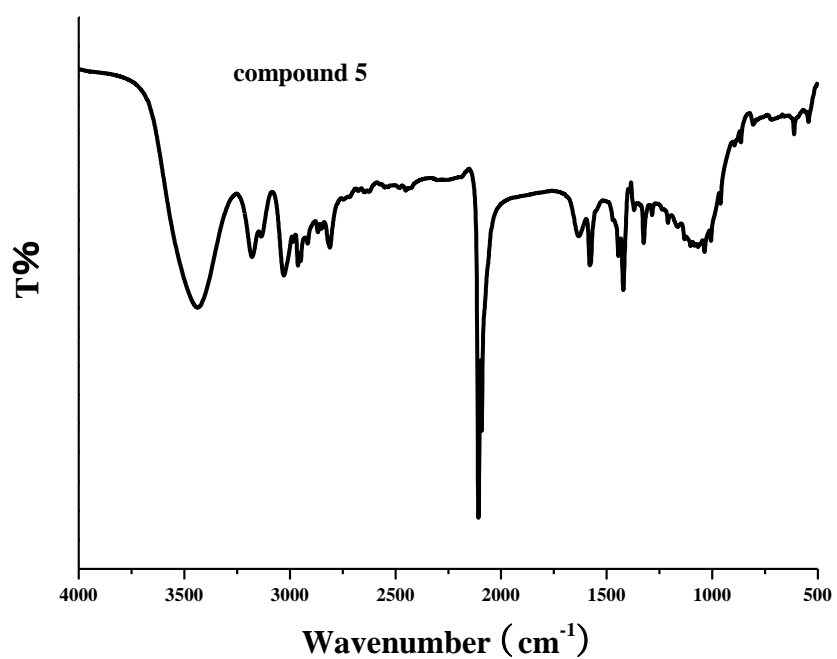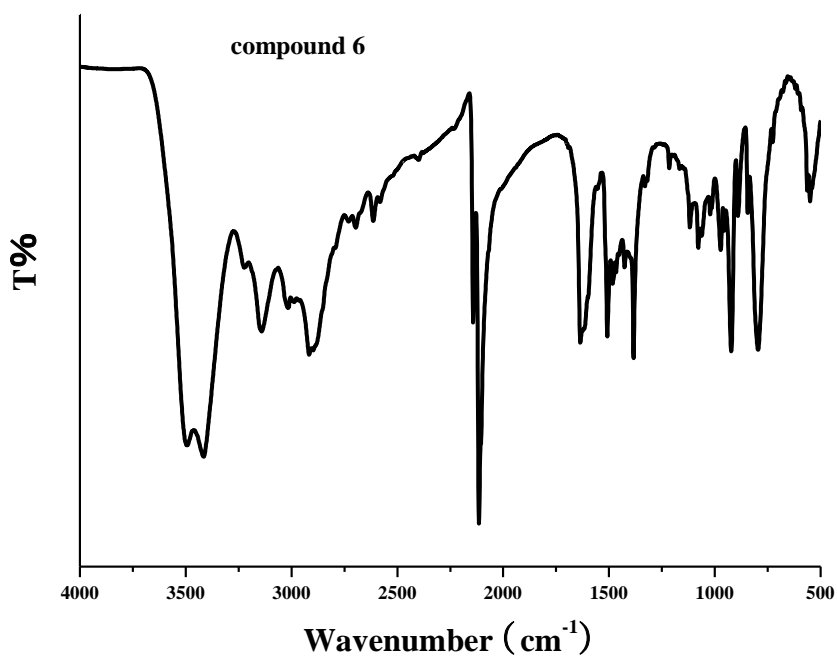

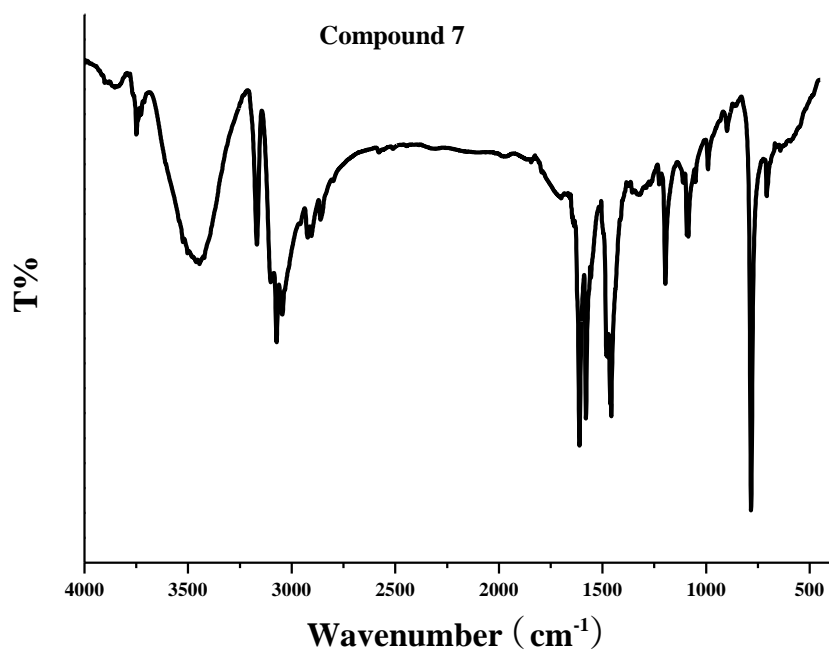

Fig. S2 The IR spectra of the title compounds.

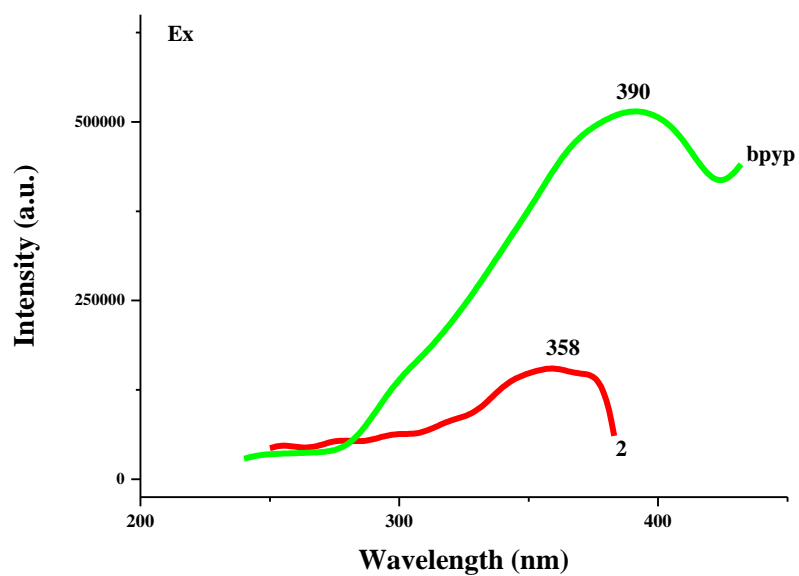

Fig. S3 The excitation spectra of compound 2 and the bppy molecule in the solid state.

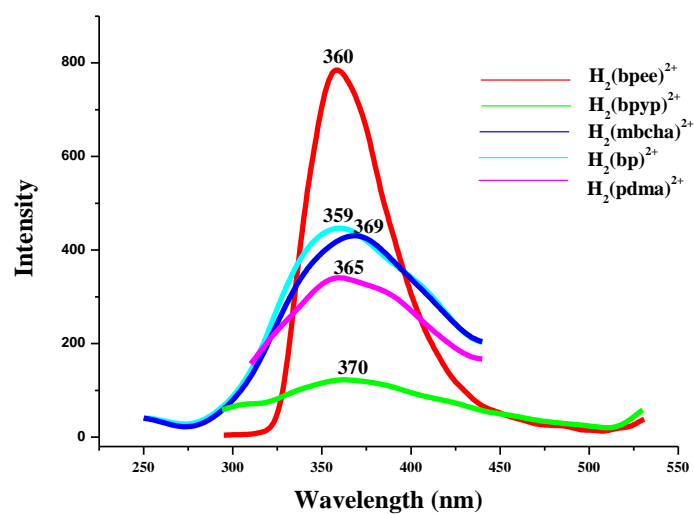

**Fig. S4** The emission spectra of the organic molecules in an acidic solution (concentration/mol·L<sup>-1</sup>:  $4.25 \times 10^{-4}$  for H<sub>2</sub>(bpee)<sup>2+</sup>,  $1.00 \times 10^{-4}$  for H<sub>2</sub>(bpyp)<sup>2+</sup>,  $2.13 \times 10^{-4}$  for H<sub>2</sub>(mbcha)<sup>2+</sup>,  $2.31 \times 10^{-4}$  for H<sub>2</sub>(bp)<sup>2+</sup>,  $2.49 \times 10^{-4}$  for H<sub>2</sub>(pdma)<sup>2+</sup>)

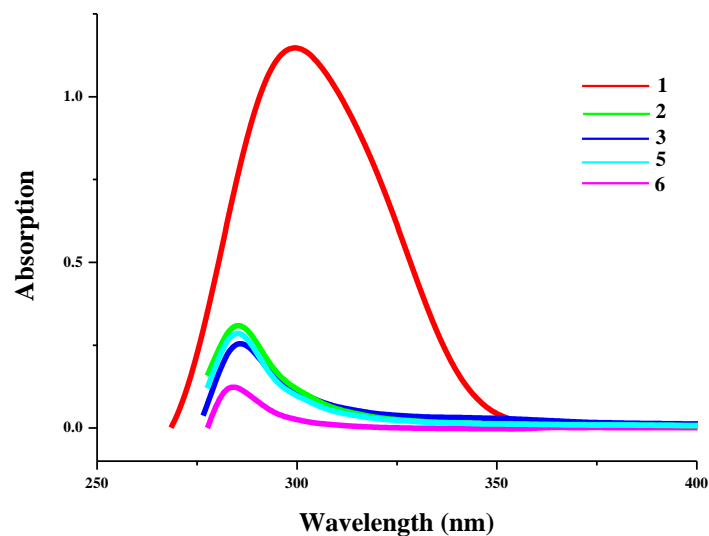

**Fig. S5** The absorption spectra of compounds **1**, **2**, **3**, **5** and **6** in an aqueous solution (concentration/mol·L<sup>-1</sup>:  $4.35 \times 10^{-5}$  for **1**,  $5.67 \times 10^{-3}$  for **2**,  $2.60 \times 10^{-3}$  for **3**,  $5.34 \times 10^{-3}$  for **5**,  $1.05 \times 10^{-3}$  for **6**)
